1 The effect of developmental pleiotropy on the evolution of insect immune genes

2

3 Thi Minh Ngo<sup>^</sup>, Alissa M. Williams<sup>^</sup>, and Ann T. Tate\*

4 Department of Biological Sciences, Vanderbilt University, Nashville, TN, USA

5 \*Author for Correspondence: Ann Tate, Department of Biological Sciences and Evolutionary

6 Studies Initiative, Vanderbilt University, Nashville, TN, USA. Email: [a.tate@vanderbilt.edu](mailto:a.tate@vanderbilt.edu)

7 <sup>^</sup> These authors contributed equally to this work.

8

9 Article Type: Research Article

10 Running Title: Pleiotropy in immune system evolution

11 Keywords: molecular evolution, Toll pathway, insect immunity, evolutionary constraint,

12 adaptive evolution

13

14

15 **Abstract**

16           The pressure to survive relentless pathogen exposure explains the frequent observation  
17 that immune genes are among the fastest-evolving in the genomes of many taxa, but an  
18 intriguing proportion of immune genes also appear to be under purifying selection. Though  
19 variance in evolutionary signatures of immune genes is often attributed to differences in gene-  
20 specific interactions with microbes, this explanation neglects the possibility that immune genes  
21 participate in other biological processes that could pleiotropically constrain adaptive selection. In  
22 this study, we analyzed available transcriptomic and genomic data from *Drosophila*  
23 *melanogaster* and related species to test the hypothesis that there is substantial pleiotropic  
24 overlap in the developmental and immunological functions of genes involved in immune  
25 signaling and that pleiotropy would be associated with stronger signatures of evolutionary  
26 constraint. Our results suggest that pleiotropic immune genes do evolve more slowly than those  
27 having no known developmental functions, and that signatures of constraint are particularly  
28 strong for pleiotropic immune genes that are broadly expressed across life stages. However,  
29 pleiotropic immune genes also contain a significantly higher proportion of positively selected  
30 sites and substitutions are more likely to be under positive selection, suggesting a mechanism to  
31 circumvent evolutionary constraint. These results support the general yet untested hypothesis that  
32 pleiotropy can constrain immune system evolution, raising new fundamental questions about the  
33 benefits of maintaining pleiotropy in systems that need to rapidly adapt to changing pathogen  
34 pressures.

35

## 36 **Introduction**

37           Over evolutionary time, organisms have developed defense mechanisms against  
38 microbial pathogens and parasites which counter-adapt, in turn, to maintain successful infection  
39 strategies. Host immune systems put selective pressure on microbes to evade host recognition,  
40 repel antimicrobial effectors, and even manipulate immune signaling components to dampen host  
41 defenses (Schmid-Hempel 2008; Heil 2016). Hosts that cannot circumvent these mechanisms  
42 could suffer massive fitness costs from infection. As a result, pressure from pathogens and  
43 parasites represents a major driving force in molecular evolution (Paterson, et al. 2010).

44           How should we expect selection to act on immune system genes? Host adaptation to  
45 microbial pressure should drive positive, directional selection or, in the face of coevolutionary  
46 negative frequency dependence, balancing selection that maintains polymorphism in populations  
47 (Casals, et al. 2011; Sackton 2019). Studies in species as diverse as humans (Mukherjee et al.  
48 2009; Casals et al. 2011), non-human mammals (Seabury, et al. 2010; Areal, et al. 2011) and  
49 insects (Sackton, et al. 2007; Obbard, et al. 2009; Rottschaefer, et al. 2015) have found evidence  
50 for both positive and balancing selection in immune system recognition and effector genes  
51 (Unckless, et al. 2016). For example, Obbard *et al.* found that *Drosophila melanogaster* immune  
52 genes, as a class, have higher rates of adaptive substitution than location-matched non-immune  
53 genes (Obbard, et al. 2009). However, these trends were driven by a few particularly rapidly  
54 evolving genes associated with a subset of immune signaling pathways, while purifying selection  
55 was surprisingly prevalent on immune genes in other pathways. If parasites frequently target or  
56 evade signaling components, why wouldn't those targets show rapid adaptation?

57           The answer may depend on a crucial but underappreciated quality of immune systems.  
58 Genetic pleiotropy arises when a single gene product contributes to multiple discrete phenotypic

59 traits, and many components of immune pathways appear to be pleiotropic. Since the discovery  
60 of the Toll pathway, for example, numerous studies (and indeed Nobel prizes) have recognized  
61 its conserved dual role in development and innate immune system signaling (Lemaitre, et al.  
62 1997; DiAngelo, et al. 2009; Anthony, et al. 2018), and proposed that this could impose  
63 constraints on immune system evolution (Obbard, et al. 2009; Tan, et al. 2021). More broadly, a  
64 recent study estimated that ~17% of human genes affect multiple discrete phenotypic traits, and  
65 functional enrichment analysis of this pleiotropic gene set revealed immune system functions to  
66 be among the most over-represented processes (Sivakumaran, et al. 2011). When a pleiotropic  
67 mutation affects uncorrelated traits, opposing forces of selection on each trait can reduce the  
68 efficacy of selection and resist the fixation of adaptive substitutions (Fraisse, et al. 2018). Thus,  
69 the adaptive evolution of pleiotropic immune genes may be constrained by the deleterious effects  
70 of substitutions on other traits.

71 Pleiotropy between development and immunity is particularly intriguing because a  
72 developmental program must be carried out faithfully for an organism to progress through its life  
73 cycle, resulting in purifying selection on genes involved in embryonic and early life  
74 development. Indeed, developmental pleiotropy (defined by the number of genetic interactions  
75 (Stark, et al. 2006)) has been shown in *D. melanogaster* to constrain positive selection in early-  
76 expressed genes due to a higher number of functional interactions in those genes that render  
77 mutations deleterious (Artieri, et al. 2009). We hypothesize that developmental pleiotropy could  
78 constrain immune gene evolution, particularly for genes involved in the most complex stages of  
79 development (Tian, et al. 2013), leading to an under-representation of signatures of positive  
80 selection on immune genes relative to theoretical expectations.

81           Insects can serve as particularly valuable models for studying the evolutionary  
82 consequences of developmental and immunological pleiotropy due to their discrete life stages, a  
83 wealth of genomic resources, and availability of studies on immune gene function (Consortium  
84 2013; Palmer and Jiggins 2015; Viljakainen 2015). The canonical components of an insect innate  
85 immune response include microbial recognition, signal transduction to initiate cellular and  
86 humoral responses, and production of effector molecules for pathogen clearance (Lemaitre and  
87 Hoffmann 2007). Many genes and signaling pathways previously identified as core participants  
88 in these processes are also broadly conserved among species (Waterhouse, et al. 2007), including  
89 two of the best studied pathways, Toll and Imd, which coordinate expression of antimicrobial  
90 peptides and other pathogen-clearing effectors (Ferrandon, et al. 2007; Tanji, et al. 2007). While  
91 the Toll pathway is the most recognized example of developmental and immunological  
92 pleiotropy in insect immune systems, previous work has highlighted potential pleiotropy within  
93 other pathways (Tate and Graham 2015). For example, the same components of the melanization  
94 pathway responsible for tanning the insect cuticle after each larval molt are also used for  
95 melanizing parasitoid eggs and neutralizing pathogenic fungi, leading to allocation issues when  
96 an insect needs to accomplish both at once (McNeil, et al. 2010; Parker, et al. 2017). Thus,  
97 pleiotropy is likely to interfere with the deployment of immune responses if a host needs to use a  
98 gene product for both development and immunity in the same life stage. Even if these functions  
99 are segregated into different life stages, however, could pleiotropy still constrain immune system  
100 evolution?

101           We predict that immune genes that have a pleiotropic developmental function will be  
102 more likely to experience evolutionary constraint, as defined by slower rates of evolution and a  
103 lower frequency of positive selection, than immune genes that have no known developmental

104 function. Further, we predict that pleiotropic genes that are crucial to multiple developmental  
105 stages will be the most constrained, relative to genes involved in more specific and less  
106 conserved developmental processes. To investigate these predictions, we combine transcriptional  
107 and functional genomics data from fruit flies (*Drosophila* spp.) to characterize the overall and  
108 immune pathway-specific degree of pleiotropy among immune and developmental genes. We  
109 then analyze the rates of evolution in immune genes using genomics data from 12 sequenced  
110 *Drosophila* species. Empirical support for our predictions would raise the question of why  
111 evolution would maintain pleiotropy between development and immunity given the potential for  
112 conflict and constraint. On the other hand, if pleiotropic immune genes are not more constrained  
113 than non-pleiotropic ones, this study could inspire future investigations into compensatory  
114 evolution and the role of network architecture in minimizing evolutionary conflict.

115

## 116 **Results**

### 117 *Extent of developmental pleiotropy in immune genes*

118 To determine the prevalence of developmental pleiotropy among immune genes, we started  
119 by curating separate lists of immune and developmental genes. Previous studies have employed  
120 various methods to curate gene lists, ranging from using only Gene Ontology annotations  
121 (Fraisse, et al. 2018) to compiling experimentally confirmed and/or computationally predicted  
122 immune gene orthologs (Early, et al. 2017). Taking these different approaches into account, we  
123 employed several sources to assemble a comprehensive suite of genes that participate in  
124 immunity (Table 1 and Methods). In total, we assembled a list of 808 immune genes, of which  
125 551 genes have known canonical roles in immunity and 107 genes play a role in immune system  
126 development, as annotated by Gene Ontology and previous studies (Early, et al. 2017). The

127 degree of overlap between different immune gene list sources can be found in Supplemental  
128 Figure 1. The list of developmental genes contains 3346 genes, of which 262 genes are annotated  
129 specifically as “embryonic development” genes and 508 as “post-embryonic development.”  
130 Some embryonic development genes also participate in post-embryonic development (overlap  
131 visualized in Supplemental Figure 2).

132 Genes that appear in both the immune and developmental gene lists were labeled as  
133 “pleiotropic.” When considering immune genes as those identified by all methods including  
134 manually curated, GO annotated and differentially expressed genes, we found 354 immune genes  
135 (43.8%) to be pleiotropic (Table 1, row 1). When constraining the definition of immune gene to  
136 those that directly contribute to an immune response while excluding genes participating in  
137 development of the immune system, 299 (39.7%) genes are considered pleiotropic (Table 1, row  
138 2). Under the most conservative definition of development (only genes that directly participate in  
139 embryonic development or 7.8% (262/3346) of all annotated developmental genes), 52 immune  
140 genes (6.9%) still meet the definition of pleiotropy (Table 1, row 3). The full list of immune,  
141 developmental, and pleiotropic genes under different categorization methods is included in  
142 Supplemental Table 1. Note that although we used several methods to compile a list of  
143 pleiotropic genes, the conclusions generated throughout this study are robust to different  
144 categorical definitions of immunity, development, and pleiotropy (see expanded discussion in  
145 Methods). Therefore, from this point on, for simplicity, we refer to our immune gene group as  
146 those defined using the sources from Table 1, row 2, which comprises Immune Response GO-  
147 annotated genes, immune genes employed in previous large scale studies, and a core set of genes  
148 differentially expressed in ten bacterial infections (Troha et al. 2018).

149 *Comparison of pleiotropic and non-pleiotropic immune gene characteristics*

150 Immune genes can be categorized into different classes, such as recognition, signaling,  
151 and effector, depending on their canonical function in an immune response. We were curious  
152 whether certain classes of immune genes are more likely to have pleiotropic status than others.  
153 We divided immune genes into major categories, relying on both annotation from previous  
154 studies (Sackton, et al. 2007; Early, et al. 2017) and manual annotation based on gene description  
155 in FlyBase (Supplemental Table 2). According to this classification system, the number of genes  
156 confirmed to each category includes 33 recognition genes, 123 signaling genes and 27 effector  
157 genes (Supplemental Figure 3). As represented in Figure 1A, the signaling immune class  
158 contains the highest proportion of pleiotropic genes (66.67%,  $n = 123$ ), and the different groups  
159 contain a significantly different proportion of pleiotropic genes overall ( $X^2 = 37.94$ ,  $p < 0.0001$ ).  
160 Moreover, using the PANTHER pathway database, we found that pleiotropic genes are, on  
161 average, associated with more pathways than non-pleiotropic ones (Supplemental Table 3).

162 We also wanted to know whether our curated immune-developmental pleiotropic genes  
163 exhibit characteristics associated with alternative definitions of pleiotropy, such as a high  
164 number of associated protein-protein interactions and gene-gene interactions that reflect activity  
165 at the molecular level. When comparing pleiotropic and non-pleiotropic immune genes (Figure  
166 1B-C), we do find that pleiotropic genes have significantly more protein-protein interactions  
167 (Kruskal-Wallis w/ Dunn post-hoc test,  $p_{\text{adj}} = 3.8e-05$ ) and more gene-gene interactions  
168 (Kruskal-Wallis w/ Dunn post-hoc test,  $p_{\text{adj}} = 6.3e-07$ ). Moreover, pleiotropic genes are  
169 associated with more Biological Processes (Wilcoxon test,  $p < 2e-16$ ) and Molecular Functions  
170 (Wilcoxon test,  $p < 2e-16$ ) GO terms than non-pleiotropic genes (Supplemental Figure 4).

171 ***Expression specificity across stages and tissues between pleiotropic and non-pleiotropic genes***



172 To investigate the hypothesis that broadly expressed pleiotropic genes are under stronger  
173 evolutionary constraint than specific ones, we determined gene expression specificity across life  
174 stages and tissues for pleiotropic and non-pleiotropic immune genes using the  $\tau$  specificity index  
175 ((Yanai, et al. 2005), see methods). A large  $\tau$  value indicates specific expression while a small  
176 value indicates broad expression across stages or tissues. While we could not confidently  
177 determine whether any given gene plays only a developmental or immunological role or both at  
178 any given stage, genes involved in development at multiple life stages may present a temporal as  
179 well as evolutionary constraint on the immunological function of that gene.

180 We found that, in uninfected insects, pleiotropic immune genes (median  $\tau = 0.670$ ) are  
181 significantly more broadly expressed across stages than non-pleiotropic immune genes (Figure  
182 2A, median  $\tau = 0.731$ ; Kruskal-Wallis w/Dunn test,  $p_{\text{adj}} = 0.0009$ ), but have similar expression  
183 breadth profiles as non-pleiotropic developmental genes (median  $\tau = 0.691$ ; Kruskal-Wallis  
184 w/Dunn test,  $p_{\text{adj}} = 0.07$ ). We also found that the most stage-specific pleiotropic genes,  
185 determined by the top quartile in  $\tau$  value, disproportionately exhibit maximal expression during  
186 the embryonic stage (43% among specific pleiotropic genes vs 3.6% among specific non-  
187 pleiotropic immune genes) while the most specific non-pleiotropic immune genes exhibit a  
188 relatively even distribution of maximal expression across subsequent stages (Figure 2B,  
189 Supplemental Table 4). At the tissue level, pleiotropic genes are also expressed more broadly  
190 than non-pleiotropic immune genes, and this trend is consistent throughout all life stages (Figure  
191 2C). We found no significant differences in tissue expression specificity between developmental  
192 genes and pleiotropic genes except in the adult stage (Figure 2C), where developmental genes  
193 showed more specific patterns of expression.

194 *Evolutionary rates among different gene categories*

195 To address whether pleiotropic genes are more evolutionarily constrained than non-  
196 pleiotropic genes, we calculated  $d_N/d_S$  values using codeml site model M0 in PAML v4.9j (Yang  
197 2007), which assigns a single  $d_N/d_S$  value to an entire tree (see Methods). We ran this PAML  
198 model for concatenations of genes in 12 *Drosophila* species (Supplemental Table 5), where each  
199 concatenation represented one of three categories of genes: non-pleiotropic immune, pleiotropic,  
200 and non-pleiotropic developmental. Genes for each concatenation were defined using Table 1  
201 row 2, and after quality control, these concatenations contained 356, 231, and 2067 genes,  
202 respectively. We also ran codeml site model M0 on each individual gene included in the  
203 concatenations; these model runs were successful for 348 non-pleiotropic immune genes, 227  
204 pleiotropic genes, and 2037 non-pleiotropic developmental genes (see Methods).

205 The model runs on the concatenated gene lists yielded  $d_N/d_S$  estimates of 0.098 for non-  
206 pleiotropic immune genes, 0.077 for pleiotropic genes, and 0.078 for non-pleiotropic  
207 developmental genes. Meanwhile, model runs on individual genes yielded median  $d_N/d_S$   
208 estimates (Figure 3A) of 0.085, 0.063, and 0.063 respectively, and these three categories  
209 exhibited significantly different  $d_N/d_S$  distributions based on a Kruskal-Wallis test (Figure 3A,  $\chi^2$   
210 = 66.53,  $p = 3.57e-15$ ). Pairwise comparisons of individual gene  $d_N/d_S$  values were calculated  
211 using post-hoc Dunn tests adjusted for multiple comparisons. The comparison between  
212 pleiotropic genes and developmental non-pleiotropic genes does not show a statistically  
213 significant difference ( $p = 0.95$ ), but non-pleiotropic immune genes have a statistically different  
214 distribution relative to both non-pleiotropic developmental genes ( $p = 1.8e-15$ ) and pleiotropic  
215 genes ( $p = 4.2e-08$ ).

216           Within the pleiotropic gene set, we found that the most specifically stage-expressed genes  
217 (top  $\tau$  quartile, e.g. Fig. 2B) had significantly lower  $d_N/d_S$  ratios than the most broadly expressed  
218 pleiotropic genes (bottom  $\tau$  quartile;  $n = 41$ /quartile, Wilcoxon test,  $p = 0.023$ , Fig. 3B).

### 219 ***Evidence for positive selection across gene categories***

220           To determine whether there is evidence for positive selection in any of the three gene  
221 categories, we ran codeml site models M7 and M8 in PAML v4.9j (Yang 2007) on each  
222 concatenation (see Methods). Model M7 splits the codons in the alignment into 10 groups, where  
223 each group contains 10% of the full alignment and has a  $d_N/d_S$  value constrained to be less than  
224 1. Model M8 splits the alignment into 11 groups, where the proportion of the alignment  
225 represented by each group varies; the first 10 groups in M8 have  $d_N/d_S$  values constrained to be  
226 less than 1, while group 11 can have a  $d_N/d_S$  value greater than 1 (representing positive selection  
227 in that group of codons). These two models are compared using a likelihood ratio test with two  
228 degrees of freedom to determine whether a model allowing for positive selection is a better fit for  
229 the data than a model that does not.

230           A likelihood ratio test between the two models provided significant evidence for positive  
231 selection in a fraction of sites within the concatenated alignments of each of the three categories  
232 ( $p < 0.001$  for all). In the case of the non-pleiotropic immune gene concatenation, the proportion  
233 of sites in the eleventh category was 0.007 with an omega value of 5.37. The proportion of sites  
234 in the eleventh category for the pleiotropic gene concatenation was 0.015 with an omega value of  
235 1.37. The non-pleiotropic developmental gene concatenation yielded a similar result as the  
236 pleiotropic one, with a proportion of 0.018 and omega value of 1.29. The three proportions  
237 calculated by model M8 were all statistically different from one another (Chi-squared = 1034.6,

238  $p < 2.2e-16$ ) and each pairwise comparison of proportions was statistically different even after  
239 Bonferroni correction ( $p < 2.2e-16$  for all three).

240 We also compared proportions of sites under positive selection identified by Bayes  
241 Empirical Bayes (BEB) analysis in model M8. We defined positively selected sites as those with  
242 a probability of  $d_N/d_S > 1$  of 0.95 or above as detected by BEB analysis. The percentages of sites  
243 under positive selection were 0.059%, 0.12%, and 0.13% for the non-pleiotropic immune,  
244 pleiotropic, and non-pleiotropic developmental categories, respectively. A Chi-squared test  
245 showed that these proportions were statistically different from one another ( $p = 8.99e-12$ ).  
246 Pairwise Chi-squared tests with Bonferroni correction confirmed the statistically significant  
247 difference between the non-pleiotropic immune concatenation and the other two concatenations  
248 ( $p < 0.001$  in both cases). There was not a significant difference in this proportion between the  
249 pleiotropic and non-pleiotropic developmental concatenations ( $p = 0.40$ ).

### 250 *Evidence of adaptive evolution across gene categories*

251 The PAML results indicated that non-pleiotropic immune genes had higher  $d_N/d_S$  values  
252 than either pleiotropic genes or non-pleiotropic developmental genes; the latter two categories  
253 were not statistically different from one another (Figure 3A). To help determine whether this  
254 difference in  $d_N/d_S$  values was driven by adaptive evolution and/or relaxed selection, we used  
255 MultiDFE to calculate  $\alpha$  and  $\omega_a$  for 100 bootstrap replicates of each of the three categories  
256 separately for two populations of *Drosophila melanogaster*: Raleigh (RAL) and Zambia (ZI).  
257 We obtained site frequency spectra from PopFlyData in the iMKT package (Murga-Moreno, et  
258 al. 2019) and final values of  $\alpha$  and  $\omega_a$  were determined using a Jukes-Cantor correction.

259 We found that there were significant differences in  $\alpha$  across categories in both the RAL  
260 and ZI populations (Figure 3C,D;  $p < 2.2e-16$  for both). Median values of  $\alpha$  for the non-

261 pleiotropic immune genes, pleiotropic genes, and non-pleiotropic developmental genes,  
262 respectively, were 0.647, 0.774, and 0.714 for RAL and 0.724, 0.843, and 0.803 for ZI. Post-hoc  
263 Dunn tests revealed that there were significant differences in all pairwise comparisons of  $\alpha$  for  
264 both populations even after Bonferroni correction ( $p < 0.001$  in all cases). For both populations,  
265 the median  $\alpha$  value was highest in the pleiotropic gene class, followed by the non-pleiotropic  
266 developmental gene class and then by the non-pleiotropic immune gene class.

267 There were also significant differences in  $\omega_a$  across categories in both populations  
268 (Supplemental Figure 5;  $p = 3.202e-13$  for RAL,  $p < 2.2e-16$  for ZI). Median values of  $\omega_a$  for  
269 non-pleiotropic immune genes, pleiotropic genes, and non-pleiotropic developmental genes,  
270 respectively, were 0.160, 0.178, and 0.152 for RAL and 0.192, 0.214, and 0.187 for ZI. Post-hoc  
271 Dunn tests for the RAL population found that all pairwise comparisons of  $\omega_a$  were significant  
272 after Bonferroni correction ( $p < 0.001$  in all cases). For the ZI population,  $\omega_a$  was significantly  
273 different between the pleiotropic category and both other gene classes even after Bonferroni  
274 correction ( $p < 0.001$  for both) but was not significantly different for the non-pleiotropic immune  
275 vs. non-pleiotropic developmental comparison ( $p = 0.0660$ ).

### 276 ***Evidence of positive selection in immune signaling pathways***

277 The high overall frequency of pleiotropy among immune signaling genes (Figure 1A)  
278 prompted us to examine the distribution of  $d_N/d_S$  along the three major insect immune signaling  
279 pathways (Figure 4: Imd, Toll, Jak/STAT) to further investigate whether there are certain  
280 components that tend to be pleiotropic or show discernable patterns of  $\omega$  values. We also ran  
281 codeml site models M7 and M8 in PAML on these individual pathway components to determine  
282 whether any harbored strong evidence of positive selection.

283 As illustrated in Figure 4, extracellular signaling components tend to be non-pleiotropic,  
284 while intracellular signaling components are consistently pleiotropic. The exceptions are  
285 immune-specific adapters within the IMD signaling pathway (e.g. Tab2 and Kenny) that interact  
286 with pleiotropic proteins. There were no clear patterns with regard to overall  $d_N/d_S$  distribution  
287 along these pathways, as both the intracellular and extracellular compartments contain proteins  
288 with relatively low and high  $d_N/d_S$  values. While any estimate of positive selection for individual  
289 genes through comparison of model M7 and M8 outputs will be underpowered and thus overly  
290 conservative because of the small number of sites, our analysis did still identify several genes in  
291 these pathways that contain sites undergoing positive selection (Figure 4 gold stars). Most of  
292 these genes are extracellular (ModSP, Sphinx, Upd3) or involved in pathogen recognition (e.g.  
293 PGRP-LC; PGRP-LA) and thus conform to the typical profile for immune genes experiencing  
294 rapid evolution. However, we also found that the pleiotropic intracellular caspase Dredd  
295 exhibited statistical evidence of positive selection (Model 8: 5.7% of sites with average  $\omega = 1.22$ ,  
296  $p = 0.0006$ ), providing a salient candidate for future studies of pleiotropy.

## 297 **Discussion**

298 Researchers have long recognized that some immune genes, such as those in the Toll  
299 pathway, play double-duty in development (Lemaitre, et al. 1996), and posited that it might  
300 constrain immune system evolution (Obbard, et al. 2009). Pleiotropy seems like it would be a  
301 liability for a host, for multiple reasons – what if a gene product cannot be deployed to fight a  
302 parasite because it is already being fully allocated to development? Shouldn't purifying selection  
303 on developmental genes constrain the rate of adaptation against parasite pressure, putting the  
304 host at a disadvantage during coevolution with rapidly evolving parasites? In this study, we  
305 investigated the relationship between immunity-development pleiotropy and signatures of

306 molecular evolution in *D. melanogaster* immune genes. Our results provide clear quantitative  
307 evidence for the notion that pleiotropy between development and immunity is actually quite  
308 common (Tate and Graham 2015). Moreover, immune genes involved in development exhibit  
309 stronger signatures of evolutionary constraint than non-pleiotropic immune genes, particularly if  
310 they are broadly expressed across life stages, consistent with our hypothesis of evolutionary  
311 constraint.

312 While overall  $d_N/d_S$  values are lower for pleiotropic immune genes, our analyses looking  
313 specifically for evidence of positive selection suggest that twice as many sites are under positive  
314 selection in pleiotropic vs. non-pleiotropic immune genes, raising the question of whether  
315 compensatory evolution at specific sites might play a role in relieving evolutionary antagonism  
316 between development and immunity. Interestingly, pleiotropic genes were not significantly  
317 different from non-pleiotropic developmental genes in terms of  $d_N/d_S$  values (Figure 3A). This  
318 observation suggests that genes with both immune and developmental functions are similar to  
319 developmental-only genes rather than immune-only genes (or an intermediate between the two  
320 groups) in terms of evolutionary constraint. We also found that among the three gene categories,  
321 pleiotropic immune genes had the highest  $\alpha$  values while non-pleiotropic immune genes had the  
322 lowest  $\alpha$  values (Figure 3C,D), suggesting that increased  $d_N/d_S$  values in the non-pleiotropic  
323 immune category are at least partially due to an increase in relaxed selection relative to the  
324 pleiotropic category. A higher proportion of adaptive substitutions in the pleiotropic category is  
325 consistent with the stronger purifying selection in those genes compared to non-pleiotropic  
326 immune genes.

327 Our systematic curation of transcriptional data, GO terms, and functional evidence from  
328 *D. melanogaster* revealed that about 40-44% of immune genes are pleiotropic with development.

329 This estimate aligns with a phenotypic screening study in mammals that more generally  
330 classified approximately 65% of screened alleles as pleiotropic across a range of phenotypes (De  
331 Angelis, et al. 2015). Upon analyzing the different immune gene classes for their prevalence of  
332 pleiotropy (Figure 1A), we found that immune signaling genes are most likely to participate in  
333 developmental functions. This is expected since a signaling pathway is capable of activating the  
334 transcription of multiple genes, as opposed to, for example, effector genes which likely only  
335 interact with microbial pathogens or have specific immune functions. Further, genes annotated as  
336 pleiotropic through our classification method also exhibited significantly higher values of  
337 molecular parameters associated with pleiotropy (Alvarez-Ponce, et al. 2017), as they have more  
338 protein-protein and gene-gene interactions (Figure 1B,C) and are expressed more broadly across  
339 life stages and tissues (Figure 2B,C). Although these interactions may not directly reflect  
340 immune or developmental activities, it suggests that the pleiotropic genes might participate in  
341 different processes by interacting with more molecular partners. The broader expression of  
342 pleiotropic genes across stages compared to non-pleiotropic genes suggests that one or both of  
343 the immune and developmental functions are required throughout ontogeny. Finally, among the  
344 most specifically-expressed immune genes (Figure 2B), pleiotropic genes were  
345 disproportionately expressed in embryos and pupae – key developmental stages – while the  
346 maximum expression of non-pleiotropic genes was more evenly distributed among post-  
347 embryonic life stages. This may reflect decoupling of immunological regulation across life  
348 stages, which could allow the different life stages to independently optimize immune responses  
349 over evolutionary time as they are exposed to different parasites and ecological conditions  
350 (Fellous and Lazzaro 2011; Critchlow, et al. 2019; Rolff, et al. 2019). In the future, it would be  
351 interesting to clarify the extent to which pleiotropic genes exhibit temporal segregation of



352 developmental processes and immune roles in different life stages, as opposed to simultaneous  
353 participation in both functions in one or more stages.

354 Our results suggest a significant association between pleiotropy status and the rate of  
355 molecular evolution in immune system genes. Other studies that have considered the general  
356 relationship between signatures of molecular evolution and molecular pleiotropy have reached  
357 contrasting conclusions. In some cases, pleiotropy, as defined by connectivity in protein-protein  
358 or gene co-expression networks, is negatively correlated with molecular evolution rates  
359 (Alvarez-Ponce, et al. 2017; Masalia, et al. 2017) as we observe in our study. Meanwhile, others  
360 have detected very minimal or no correlation (Hahn, et al. 2004; Fraïsse, et al. 2018). The  
361 variance in these results could be attributed to differences in study organisms, different  
362 experimental contexts and the inherent differences in the various definitions of pleiotropy. For  
363 example, our definition of pleiotropy focused on two primary traits rather than considering the  
364 entire constellation of traits that might push estimates of pleiotropy in immune systems even  
365 higher. The two traits we chose, however, cover the extreme ends of evolutionary rate  
366 predictions, as development is thought to be one of the most conserved processes (Artieri, et al.  
367 2009), while immunity is consistently identified as one of the most rapidly evolving systems  
368 across studied taxa (Obbard, et al. 2006; Areal, et al. 2011).

369 Our analyses of positive selection in pleiotropic and non-pleiotropic immune genes  
370 suggests that while the  $\omega$  of positively selected sites is lower in pleiotropic immune genes, there  
371 are twice as many positively selected sites (1.5% vs 0.7% in PAML model M8 output) in  
372 pleiotropic immune genes relative to non-pleiotropic ones. Additionally,  $\alpha$  values, which  
373 represent the proportion of substitutions drive by positive selection, were significantly higher in  
374 pleiotropic genes than in the other two categories. These results reflect key conclusions from a

375 recent study demonstrating that virus-interacting proteins that participate in diverse cellular  
376 processes, which are otherwise more evolutionarily constrained, also showed higher rates of  
377 adaptation relative to those that are not known to interact with viruses (Enard, et al. 2016). We  
378 speculate that when mutations occur in pleiotropic proteins that have antagonistic effects on  
379 immunity or development, compensatory substitutions could arise to resolve this conflict. For  
380 example, a previous study suggested that the presence of a non-synonymous mutation greatly  
381 increases the chance of finding other substitutions nearby, possibly reflecting the correlated  
382 evolution of codons within a protein module (Callahan, et al. 2011). Because our analyses are not  
383 domain-specific, we cannot parse signatures of selection on regions within a pleiotropic gene that  
384 might provide specific immune or developmental functions or that could be closely associated  
385 with compensatory mutations. Although such analysis would require very specific knowledge of  
386 the effect of each mutation on immune and development phenotypes, future analyses could focus  
387 on a subset of genes with well-defined protein domain structures and protein-protein interaction  
388 data (e.g. Dredd and Jak; Figure 4, gold stars) to refine the functional and evolutionary  
389 significance of pleiotropic activity.

390         Across immune pathways, intracellular components are disproportionately pleiotropic  
391 compared to extracellular components (Figure 4). Interestingly, however, we observed that many  
392 pleiotropic intracellular signaling components associate with non-pleiotropic adapters or interact  
393 with proteins that exhibit higher rates of adaptation, which could provide a way to modify  
394 pleiotropic protein function in specific immunological contexts to relieve antagonism (Kinsler, et  
395 al. 2020). This analysis raises new questions for future investigation: how can a signaling  
396 pathway balance its role in multiple biological processes? What are the key players and their  
397 characteristics that affect how a pathway is used across several contexts or life stages?

398 Overall, our study serves as the first one to systematically quantify the degree of  
399 pleiotropy in a specific biological context and investigate correlations between pleiotropy and  
400 rates of molecular evolution in immune systems. These results lay the groundwork for future  
401 work to tease apart the mechanistic framework of these pleiotropic patterns to understand how  
402 genetic architecture shapes the mode and tempo of immune system evolution and their influence  
403 on immune phenotypes.

404

## 405 **Methods**

### 406 *Immune and developmental gene list curation*

407 We curated a comprehensive list of genes representing immunity by combining several  
408 resources, starting with manually curated list from previous immune studies (Lemaitre and  
409 Hoffmann 2007; Early, et al. 2017), which include most experimentally validated “canonical”  
410 immune genes. Separately, we appended Gene Ontology (GO)-annotated genes under the term  
411 “immune system process” (GO:0002376) to the list. We further sub-divided genes under this GO  
412 term into either “Immune Response” or “Immune Development” genes to differentiate between  
413 genes that play direct roles in mounting an immune response and genes contributing to the  
414 development and maturation of the immune system. Finally, we added to our list a core set of  
415 immune genes from (Troha, et al. 2018), which comprises 252 genes that show differential  
416 expression across infection with ten different bacterial species of variable virulence.

417 For each immune gene, we also assigned an immune gene class – recognition, signaling, or  
418 effector - based on the gene’s known function in the immune system. If a gene has not been  
419 assigned a class in previous studies, we manually assign it a class based on the gene description

420 from FlyBase. For a detailed description of each gene class definition, see Supplemental  
421 Protocol.

422 Separately, we created a list of GO-annotated developmental genes by querying the term  
423 “Developmental Process” (GO:0032502), while separately annotating genes belonging to the  
424 child term “embryonic morphogenesis” (GO:0048698). All GO annotation queries were  
425 conducted through FlyBase (Thurmond, et al. 2019). A full list of genes in each group is  
426 included in Supplemental Table 1 and visualization of the degree of overlap between different  
427 resources is in Supplemental Figure 1.

#### 428 *Pleiotropy categorization*

429 Pleiotropy refers to the phenomenon where a single gene influences multiple traits. However,  
430 the definition of “trait” can be ambiguous across different biological contexts, and thus  
431 pleiotropy can manifest at different levels and be detected by various methods (Paaby and  
432 Rockman 2013; Tyler, et al. 2016). At the molecular level, pleiotropy can refer to the multiple  
433 biochemical roles that a gene can have and is frequently measured as the number of physical  
434 interacting partners (Hahn, et al. 2004). At the developmental or phenotypic level, pleiotropy can  
435 involve genes affecting distinct phenotypes or biological processes, as measured by the number  
436 of stage or tissues in which such genes are expressed (Artieri, et al. 2009). Lastly, under an  
437 evolutionary perspective, pleiotropy can refer to the separate components of fitness that a gene  
438 might modulate, a well-known example being the antagonistic pleiotropy model for the evolution  
439 of aging (Williams 1957). Though many interpretations of pleiotropy exist, in this study, we are  
440 specifically concerned about pleiotropic genes at the phenotypic level. In particular, we focused  
441 on genes annotated to play roles in both immune and developmental processes. As such, if a gene  
442 is annotated as functioning in both immunity and development from the lists curated from the

443 method described above, it was considered pleiotropic. A full list of pleiotropic genes is included  
444 in Supplemental Table 1.

445 For comparison purposes, we also calculated molecular metrics of pleiotropy for each gene in  
446 the genome regardless of annotated function in immunity or development. These measurements  
447 include expression stage specificity (described below), number of associated Biological  
448 Processes GO terms, number of associated Molecular Functions GO terms, number of protein-  
449 protein interactions, and number of gene-gene interactions. All raw data files were obtained  
450 through the FlyBase ftp server, and the latest version of each file was downloaded (March 2020,  
451 Supplemental Protocol).

#### 452 *Categorization of stage and tissue specificity*

453 Genes with functions limited to specific tissues or life stages (and particularly later life  
454 stages) may have less pervasive effects on organismal fitness (Cutter and Ward 2005; Artieri, et  
455 al. 2009), possibly buffering evolutionary constraint from pleiotropy. To calculate expression  
456 specificity, we applied the following equation (Yanai, et al. 2005) to expression level data of all  
457 *D. melanogaster* genes in all stages (embryo, larva, pupa, adult) and tissues (Supplemental  
458 Methods):

$$459 \tau = \frac{\sum_{j=1}^n 1 - \log(A_j) / \log(A_{\max})}{n-1}$$

460 In this equation, n is the number of of stages or tissues.  $A_j$  is the expression level at stage/tissue j,  
461  $A_{\max}$  the maximum expression level of of stages/tissues. Lower tau ( $\tau$ ) values signify specific  
462 expression in a certain stage/tissue, while a higher one indicates broad expression across all  
463 stages/tissues (Fraïsse, et al. 2018). Tau values for all of the genes used in the analysis are  
464 provided in Supplemental Table 6.

#### 465 *Pathway annotation*

466 We used the PANTHER database to annotate our gene lists to pathway, if available. In  
467 short, all genes are compiled into a list of IDs, which is then used as a query in PANTHER  
468 (<http://pantherdb.org/>). We then downloaded the annotations and computed the total number of  
469 unique pathways associated with each gene group (pleiotropic vs. non-pleiotropic).

#### 470 *Compiling sequences for PAML analyses*

471 Genes included in our analyses were chosen using the Table 1 row 2 inclusion criteria for  
472 non-pleiotropic immune (454 genes), pleiotropic (299 genes), and non-pleiotropic developmental  
473 (3047 genes) lists. We used the FlyBase gene IDs to download coding sequences (CDSs) using  
474 the FlyBase Sequence Downloader tool (FB2021\_05, released October 15, 2021) for *D.*  
475 *melanogaster* (Thurmond, et al. 2019). We then obtained a list of orthologs from FlyBase for all  
476 12 sequenced *Drosophila* species. Using custom scripts  
477 ([https://github.com/alissawilliams/pleiotropy\\_Drosophila/tree/main/scripts](https://github.com/alissawilliams/pleiotropy_Drosophila/tree/main/scripts)), we parsed out  
478 FlyBase sequence IDs for 11 other *Drosophila* species (Supplemental Table 5) for the genes of  
479 interest using the *D. melanogaster* IDs. We used the Sequence Downloader tool from an  
480 archived version of FlyBase (FB2017\_05, released October 25, 2017) to download CDSs for  
481 each gene of interest for each of the other 11 species.

482 We used another set of custom scripts to compile one sequence file for each gene of  
483 interest within each pleiotropy category. These scripts added one CDS per species to each file; in  
484 cases where more than one CDS was obtained for a single gene ID, the first CDS in the file of  
485 downloaded sequences was used. In cases of paralogy (i.e. where one species had multiple gene  
486 identifiers within a single orthogroup), the species with gene duplicates were excluded from the  
487 sequence file. After this step, 400, 294, and 2549 sequence files contained at least two sequences

488 for the non-pleiotropic immune, pleiotropic, and non-pleiotropic developmental groups,  
489 respectively.

490 Next, sequence files containing at least two sequences were aligned in codon space with  
491 the *einsi* option in MAFFT v7.310 (Kato and Standley 2013) using a custom script  
492 ([https://github.com/dbsloan/perl\\_modules](https://github.com/dbsloan/perl_modules)). Successful alignment occurred for 356 non-  
493 pleiotropic immune genes, 231 pleiotropic genes, and 2067 non-pleiotropic developmental  
494 genes. These alignment files were trimmed in codon space using Gblocks v0.91b (Castresana  
495 2000) with parameters  $-t = c$  and  $-b5 = h$ . These trimmed files were used in downstream PAML  
496 analyses.

#### 497 ***Calculating gene-wide $d_N/d_S$ values using PAML***

498 The trimmed sequence files were individually run through codeml site model M0 in  
499 PAML v4.9j (Yang 2007) to obtain  $d_N/d_S$  values for each gene. The codeml command was run  
500 using  $seqtype = 1$ ,  $CodonFreq = 2$ ,  $model = 0$ ,  $NSsites = 0$ , and  $cleandata = 0$ . Constraint trees  
501 for each gene were built by starting with the known species tree for the 12 *Drosophila* species on  
502 FlyBase and eliminating any species not present in the particular sequence file. The site model  
503 M0 runs were successful for 348 of the 356 non-pleiotropic immune genes, 227 of the 231  
504 pleiotropic genes, and 2037 of the 2067 non-pleiotropic developmental genes.  $d_N/d_S$  values across  
505 the three gene categories were compared using a Kruskal-Wallis test followed by post-hoc Dunn  
506 tests in R (R\_Core\_Team 2012).

#### 507 ***Detection of positive selection using PAML site models***

508 To detect positive selection in genes of the three categories, we used codeml site models  
509 M7 and M8 in PAML. The trimmed files for each category were concatenated into single  
510 alignments and run through codeml with parameters  $seqtype = 1$ ,  $CodonFreq = 2$ ,  $model = 0$ ,

511  $NSsites = 78$ , and  $cleandata = 0$ . A constraint tree for the 12 *Drosophila* species was built based  
512 on the phylogeny provided on FlyBase (Thurmond, et al. 2019). Within each class of genes,  
513 models M7 and M8 were compared using likelihood ratio tests ( $df = 2$ ). Site model M0 ( $model =$   
514  $0$ ,  $NSsites = 0$ ) was also run for each of the three concatenated gene sets using the same  
515 parameters as described in the previous section. Comparisons of proportions of sites under  
516 positive selection were calculated in two ways. First, the proportion identified by model M8 was  
517 multiplied by the total number of sites in each concatenated alignment and rounded to the nearest  
518 whole number for use in a Chi-squared test in R. Pairwise Chi-squared tests were also conducted  
519 and the p-value used for detecting significance was determined using a Bonferroni correction for  
520 multiple testing. Second, we extracted  $d_N/d_S$  values from the Bayes Empirical Bayes analysis  
521 output (also from model M8) for all sites with a reported probability of  $d_N/d_S > 1$  of 0.95 or  
522 above. The numbers of sites under positive selection using this criterion were also used in Chi-  
523 squared tests, along with the total number of sites in each alignment. Again, pairwise Chi-  
524 squared tests in R were evaluated after Bonferroni correction for multiple testing.

525 In addition to the concatenated sequences, we ran codeml site models M7 and M8 on  
526 individual pleiotropic and non-pleiotropic immune genes from the three KEGG-annotated  
527 immune signaling pathways (Figure 4).

### 528 ***Calculation of $\alpha$ and $\omega_a$ using MultiDFE***

529 To calculate the proportion of substitutions driven by positive selection ( $\alpha$ ) and the rate of  
530 adaptive substitutions ( $\omega_a$ ), we used PopFly data from the Raleigh (RAL) and Zambia (ZI)  
531 populations (Hervas, et al. 2017) in the iMKT package in R (Murga-Moreno, et al. 2019) as input  
532 to the software package MultiDFE (<https://github.com/kousathanas/MultiDFE>). The MultiDFE  
533 input was in the form of site frequency spectra (SFS). The PopFly data was obtained from the



534 file `dsimDmelSites.tab` provided by Jesús Murga-Moreno (Murga-Moreno, et al. 2019). Of the  
535 356 non-pleiotropic immune genes, 231 pleiotropic genes, and 2067 non-pleiotropic  
536 developmental genes included in the concatenated alignments, the `dsimDmelSites.tab` contained  
537 317, 207, and 1757, respectively, for the RAL population and 350, 226, and 1959, respectively,  
538 for the ZI population. We modified code in the iMKT Jupyter notebook  
539 (<https://nbviewer.org/github/jmurga/iMKTDData/blob/master/notebooks/dmelProteins.ipynb>,  
540 accessed 1 June 2022) to obtain raw counts of variants for each gene in each population. We then  
541 used bootstrapping to create 100 samples for each gene class in each population by summing  
542 variant counts as well as  $\pi$ ,  $p_0$ ,  $d_i$ ,  $d_0$ ,  $m_i$ , and  $m_0$  from the iMKT PopFlyData table (Murga-  
543 Moreno, et al. 2019). We calculated the 0<sup>th</sup> column of each SFS (i.e. the number of sites with no  
544 observed variants) using the equations  $m_i - \pi$  and  $m_0 - p_0$  for nonsynonymous and synonymous  
545 sites, respectively. Scripts used for this process are provided at  
546 [https://github.com/alissawilliams/pleiotropy\\_Drosophila/tree/main/scripts](https://github.com/alissawilliams/pleiotropy_Drosophila/tree/main/scripts).

547 We ran MultiDFE with the recommended parameters `-conpop 0`, `-sfsfold ,1` `-selmode 4`, `-`  
548 `nspikes 0`, and `-ranrep 1` (Kousathanas and Keightley 2013) for each bootstrapped SFS file  
549 (<https://github.com/kousathanas/MultiDFE>, downloaded 14 April 2022). We then extracted the  
550 average fixation probability (`fix_prob`) for each bootstrap replicate for each population from its  
551 respective `.sfs.MAXL.out` output file and calculated  $\alpha$  and  $\omega_a$  by plugging `fix_prob` from  
552 MultiDFE and the summed  $d_i$  and  $d_0$  from PopFlyData into equations 10 and 11 from  
553 (Kousathanas and Keightley 2013). Values of  $d_i$  and  $d_0$  were corrected using the Jukes-Cantor  
554 correction function provided on the MultiDFE GitHub page  
555 (<https://github.com/kousathanas/MultiDFE>, accessed 14 April 2022). Distributions of  $\alpha$  and  $\omega_a$   
556 values were compared for the RAL and ZI populations separately using a Kruskal-Wallis test

557 followed by post-hoc Dunn tests in R (R\_Core\_Team 2012) in cases where the Kruskal-Wallis  
558 test produced a significant result.

### 559 *Statistical Analysis*

560 All statistical analyses were conducted in R (4.1.0). We used Shapiro tests to assess  
561 distribution normality in datasets. For comparison between multiple groups, we conducted  
562 Kruskal-Wallis tests followed by pairwise Dunn tests with Benjamini-Hochberg correction in  
563 cases where there was a significant difference between groups.

### 564 **Acknowledgments**

565 We thank Nora Schulz, Stephanie Birnbaum, and other members of the Tate lab for comments  
566 and discussion. We also thank Seth Bordenstein and two anonymous reviewers for their helpful  
567 comments on an earlier version of this manuscript. Additionally, we thank Athanasios  
568 Kousathanas for his help with compilation and use of the MultiDFE software and Jesús Murga-  
569 Moreno for his help with the iMKT package. This work was supported by the National Institute  
570 of General Medical Sciences at the National Institutes of Health (grant number R35GM138007  
571 to A.T.T.).

### 572 **Data Availability**

573 Gene classifications, scripts, untrimmed and trimmed alignments, PAML output, and MultiDFE  
574 input and output are provided at [https://github.com/alissawilliams/pleiotropy\\_Drosophila](https://github.com/alissawilliams/pleiotropy_Drosophila).  
575 Additional data are provided in the Supplemental Tables and Figures.

576

577 **References**

- 578 Alvarez-Ponce D, Feyertag F, Chakraborty S 2017. Position Matters: Network Centrality  
579 Considerably Impacts Rates of Protein Evolution in the Human Protein–Protein Interaction  
580 Network. *Genome Biology and Evolution* 9: 1742-1756. doi: 10.1093/gbe/evx117
- 581 Anthoney N, Foldi I, Hidalgo A 2018. Toll and Toll-like receptor signalling in development.  
582 *Development* 145: dev156018. doi: 10.1242/dev.156018
- 583 Areal H, Abrantes J, Esteves PJ 2011. Signatures of positive selection in Toll-like receptor  
584 (TLR) genes in mammals. *BMC Evolutionary Biology* 11: 368. doi: 10.1186/1471-2148-11-368
- 585 Artieri CG, Haerty W, Singh RS 2009. Ontogeny and phylogeny: molecular signatures of  
586 selection, constraint, and temporal pleiotropy in the development of *Drosophila*. *BMC Biology*  
587 7: 42. doi: 10.1186/1741-7007-7-42
- 588 Callahan B, Neher RA, Bachtrog D, Andolfatto P, Shraiman BI 2011. Correlated evolution of  
589 nearby residues in *Drosophilid* proteins. *PLOS Genetics* 7: e1001315.
- 590 Casals F, et al. 2011. Genetic adaptation of the antibacterial human innate immunity network.  
591 *BMC Evolutionary Biology* 11: 202. doi: 10.1186/1471-2148-11-202
- 592 Castresana J 2000. Selection of Conserved Blocks from Multiple Alignments for Their Use in  
593 Phylogenetic Analysis. *Molecular Biology and Evolution* 17: 540-552. doi:  
594 10.1093/oxfordjournals.molbev.a026334
- 595 Consortium ik 2013. The i5K Initiative: Advancing Arthropod Genomics for Knowledge,  
596 Human Health, Agriculture, and the Environment. *Journal of Heredity* 104: 595-600. doi:  
597 10.1093/jhered/est050
- 598 Critchlow JT, Norris A, Tate AT 2019. The legacy of larval infection on immunological  
599 dynamics over metamorphosis. *Philosophical Transactions of the Royal Society B: Biological*  
600 *Sciences* 374: 20190066.

- 601 Cutter AD, Ward S 2005. Sexual and temporal dynamics of molecular evolution in *C. elegans*  
602 development. *Molecular Biology and Evolution* 22: 178-188.
- 603 De Angelis MH, et al. 2015. Analysis of mammalian gene function through broad-based  
604 phenotypic screens across a consortium of mouse clinics. *Nature Genetics* 47: 969-978.
- 605 DiAngelo JR, Bland ML, Bambina S, Cherry S, Birnbaum MJ 2009. The immune response  
606 attenuates growth and nutrient storage in *Drosophila* by reducing insulin signaling. *Proceedings*  
607 *of the National Academy of Sciences* 106: 20853-20858.
- 608 Early AM, et al. 2017. Survey of global genetic diversity within the *Drosophila* immune system.  
609 *Genetics* 205: 353-366.
- 610 Enard D, Cai L, Gwennap C, Petrov DA 2016. Viruses are a dominant driver of protein  
611 adaptation in mammals. *Elife* 5: e12469. doi: 10.7554/eLife.12469
- 612 Fellous S, Lazzaro BP 2011. Potential for evolutionary coupling and decoupling of larval and  
613 adult immune gene expression. *Molecular Ecology* 20: 1558-1567. doi: 10.1111/j.1365-  
614 294X.2011.05006.x
- 615 Ferrandon D, Imler J-L, Hetru C, Hoffmann JA 2007. The *Drosophila* systemic immune  
616 response: sensing and signalling during bacterial and fungal infections. *Nature Reviews*  
617 *Immunology* 7: 862-874.
- 618 Fraïsse C, Puixeu Sala G, Vicoso B 2018. Pleiotropy Modulates the Efficacy of Selection in  
619 *Drosophila melanogaster*. *Molecular Biology and Evolution* 36: 500-515. doi:  
620 10.1093/molbev/msy246
- 621 Hahn MW, Conant GC, Wagner A 2004. Molecular Evolution in Large Genetic Networks: Does  
622 Connectivity Equal Constraint? *Journal of Molecular Evolution* 58: 203-211. doi:  
623 10.1007/s00239-003-2544-0

- 624 Heil M 2016. Host Manipulation by Parasites: Cases, Patterns, and Remaining Doubts. *Frontiers*  
625 *in Ecology and Evolution* 4. doi: 10.3389/fevo.2016.00080
- 626 Hervas S, Sanz E, Casillas S, Pool JE, Barbadilla A 2017. PopFly: the *Drosophila* population  
627 genomics browser. *Bioinformatics* 33: 2779-2780. doi: 10.1093/bioinformatics/btx301
- 628 Katoh K, Standley DM 2013. MAFFT Multiple Sequence Alignment Software Version 7:  
629 Improvements in Performance and Usability. *Molecular Biology and Evolution* 30: 772-780. doi:  
630 10.1093/molbev/mst010
- 631 Kinsler G, Geiler-Samerotte K, Petrov DA 2020. Fitness variation across subtle environmental  
632 perturbations reveals local modularity and global pleiotropy of adaptation. *Elife* 9: e61271. doi:  
633 10.7554/eLife.61271
- 634 Kousathanas A, Keightley PD 2013. A comparison of models to infer the distribution of fitness  
635 effects of new mutations. *Genetics* 193: 1197-1208. doi: 10.1534/genetics.112.148023
- 636 Lemaitre B, Hoffmann J 2007. The host defense of *Drosophila melanogaster*. *Annu. Rev.*  
637 *Immunol.* 25: 697-743.
- 638 Lemaitre B, Nicolas E, Michaut L, Reichhart J-M, Hoffmann JA 1996. The dorsoventral  
639 regulatory gene cassette *spätzle/Toll/cactus* controls the potent antifungal response in *Drosophila*  
640 adults. *Cell* 86: 973-983.
- 641 Lemaitre B, Reichhart J-M, Hoffmann JA 1997. *Drosophila* host defense: Differential induction  
642 of antimicrobial peptide genes after infection by various classes of microorganisms.  
643 *Proceedings of the National Academy of Sciences* 94: 14614-14619.
- 644 Masalia RR, Bewick AJ, Burke JM 2017. Connectivity in gene coexpression networks  
645 negatively correlates with rates of molecular evolution in flowering plants. *PloS One* 12:  
646 e0182289. doi: 10.1371/journal.pone.0182289

- 647 McNeil J, Cox-Foster D, Slavicek J, Hoover K 2010. Contributions of immune responses to  
648 developmental resistance in *Lymantria dispar* challenged with baculovirus. *Journal of Insect*  
649 *Physiology* 56: 1167-1177.
- 650 Murga-Moreno J, Coronado-Zamora M, Hervas S, Casillas S, Barbadilla A 2019. iMKT: the  
651 integrative McDonald and Kreitman test. *Nucleic Acids Research* 47: W283-W288.
- 652 Obbard DJ, Jiggins FM, Halligan DL, Little TJ 2006. Natural Selection Drives Extremely Rapid  
653 Evolution in Antiviral RNAi Genes. *Current Biology* 16: 580-585. doi:  
654 [10.1016/j.cub.2006.01.065](https://doi.org/10.1016/j.cub.2006.01.065)
- 655 Obbard DJ, Welch JJ, Kim K-W, Jiggins FM 2009. Quantifying Adaptive Evolution in the  
656 *Drosophila* Immune System. *PLOS Genetics* 5: e1000698. doi: [10.1371/journal.pgen.1000698](https://doi.org/10.1371/journal.pgen.1000698)
- 657 Paaby AB, Rockman MV 2013. The many faces of pleiotropy. *Trends in Genetics* 29: 66-73.
- 658 Palmer WJ, Jiggins FM 2015. Comparative genomics reveals the origins and diversity of  
659 arthropod immune systems. *Molecular Biology and Evolution* 32: 2111-2129.
- 660 Parker BJ, Barribeau SM, Laughton AM, Griffin LH, Gerardo NM 2017. Life-history strategy  
661 determines constraints on immune function. *Journal of Animal Ecology* 86: 473-483. doi:  
662 <https://doi.org/10.1111/1365-2656.12657>
- 663 Paterson S, et al. 2010. Antagonistic coevolution accelerates molecular evolution. *Nature* 464:  
664 275-278.
- 665 R\_Core\_Team. 2012. R: a language and environment for statistical computing. .
- 666 Rolff J, Johnston PR, Reynolds S 2019. Complete metamorphosis of insects. *Philosophical*  
667 *Transactions of the Royal Society B: Biological Sciences* 374: 20190063. doi:  
668 [10.1098/rstb.2019.0063](https://doi.org/10.1098/rstb.2019.0063)

- 669 Rottschaefer SM, et al. 2015. Population Genetics of *Anopheles coluzzii* Immune Pathways and  
670 Genes. *G3: Genes|Genomes|Genetics* 5: 329-339. doi: 10.1534/g3.114.014845
- 671 Sackton TB 2019. Comparative genomics and transcriptomics of host–pathogen interactions in  
672 insects: evolutionary insights and future directions. *Current Opinion in Insect Science* 31: 106-  
673 113. doi: <https://doi.org/10.1016/j.cois.2018.12.007>
- 674 Sackton TB, et al. 2007. Dynamic evolution of the innate immune system in *Drosophila*. *Nat*  
675 *Genet* 39: 1461-1468. doi:  
676 [http://www.nature.com/ng/journal/v39/n12/supinfo/ng.2007.60\\_S1.html](http://www.nature.com/ng/journal/v39/n12/supinfo/ng.2007.60_S1.html)
- 677 Schmid-Hempel P 2008. Parasite immune evasion: a momentous molecular war. *Trends in*  
678 *Ecology & Evolution* 23: 318-326. doi: <https://doi.org/10.1016/j.tree.2008.02.011>
- 679 Seabury CM, et al. 2010. Diversity and evolution of 11 innate immune genes in *Bos taurus*  
680 *taurus* and *Bos taurus indicus* cattle. *Proceedings of the National Academy of Sciences* 107: 151-  
681 156. doi: 10.1073/pnas.0913006107
- 682 Sivakumaran S, et al. 2011. Abundant Pleiotropy in Human Complex Diseases and Traits.  
683 *American Journal of Human Genetics* 89: 607-618. doi: 10.1016/j.ajhg.2011.10.004
- 684 Stark C, et al. 2006. BioGRID: a general repository for interaction datasets. *Nucleic Acids*  
685 *Research* 34: D535-D539.
- 686 Tan W-H, et al. 2021. Population genomics reveals variable patterns of immune gene evolution  
687 in monarch butterflies (*Danaus plexippus*). *Molecular Ecology* 30: 4381-4391. doi:  
688 <https://doi.org/10.1111/mec.16071>
- 689 Tanji T, Hu X, Weber AN, Ip YT 2007. Toll and IMD pathways synergistically activate an  
690 innate immune response in *Drosophila melanogaster*. *Molecular and Cellular Biology* 27: 4578-  
691 4588.

- 692 Tate AT, Graham AL 2015. Dynamic Patterns of Parasitism and Immunity across Host  
693 Development Influence Optimal Strategies of Resource Allocation. *The American Naturalist*  
694 186: 495-512. doi: 10.1086/682705
- 695 Thurmond J, et al. 2019. FlyBase 2.0: the next generation. *Nucleic Acids Research* 47: D759-  
696 D765. doi: 10.1093/nar/gky1003
- 697 Tian X, Strassmann JE, Queller DC 2013. Dictyostelium Development Shows a Novel Pattern of  
698 Evolutionary Conservation. *Molecular Biology and Evolution* 30: 977-984. doi:  
699 10.1093/molbev/mst007
- 700 Troha K, Im JH, Revah J, Lazzaro BP, Buchon N 2018. Comparative transcriptomics reveals  
701 CrebA as a novel regulator of infection tolerance in *D. melanogaster*. *PLOS Pathogens* 14:  
702 e1006847.
- 703 Tyler AL, Crawford DC, Pendergrass SA 2016. The detection and characterization of pleiotropy:  
704 discovery, progress, and promise. *Briefings in bioinformatics* 17: 13-22.
- 705 Unckless Robert L, Howick Virginia M, Lazzaro Brian P 2016. Convergent Balancing Selection  
706 on an Antimicrobial Peptide in *Drosophila*. *Current Biology* 26: 257-262. doi:  
707 <https://doi.org/10.1016/j.cub.2015.11.063>
- 708 Viljakainen L 2015. Evolutionary genetics of insect innate immunity. *Briefings in Functional*  
709 *Genomics* 14: 407-412. doi: 10.1093/bfpg/elv002
- 710 Waterhouse RM, et al. 2007. Evolutionary dynamics of immune-related genes and pathways in  
711 disease-vector mosquitoes. *Science*.
- 712 Williams GC 1957. Pleiotropy, Natural Selection, and the Evolution of Senescence. *Evolution*  
713 11: 398-411.



714 Yanai I, et al. 2005. Genome-wide midrange transcription profiles reveal expression level  
715 relationships in human tissue specification. *Bioinformatics* 21: 650-659.

716 Yang Z 2007. PAML 4: Phylogenetic Analysis by Maximum Likelihood. *Molecular Biology and*  
717 *Evolution* 24: 1586-1591. doi: 10.1093/molbev/msm088

718

719 **List of Supplemental Tables and Figures:**

720

721 **Supplemental Table 1:** Categorization of each gene included in analysis according to different  
722 definitions of developmental pleiotropy as described in Table 1

723

724 **Supplemental Table 2:** Genes manually annotated for function derived from FlyBase (see  
725 Methods; Comparison of pleiotropic and non-pleiotropic immune gene characteristics)

726

727 **Supplemental Table 3:** Assignment of pleiotropic and non-pleiotropic genes to PANTHER  
728 pathways

729

730 **Supplemental Table 4:** Corresponding number of paralogs among *Drosophila* species for each  
731 Dmel gene

732

733 **Supplemental Table 5:** The number and percentage of specific pleiotropic and non-pleiotropic  
734 genes that showed maximum expression in each stage

735

736 **Supplemental Table 6:** Full dataset used in statistical analysis of tau results

737

738 **Supplemental Figure 1:** Venn Diagram representing the overlap between sources used to curate  
739 the immune gene list.

740

741 **Supplemental Figure 2:** Venn Diagram representing the overlap between sources used to curate  
742 the developmental gene list.

743

744 **Supplemental Figure 3:** Number of pleiotropic and non-pleiotropic genes in each immune gene  
745 list.

746

747 **Supplemental Figure 4:** Number of Biological Processes and Molecular Function GO terms  
748 associated with genes belonging to each pleiotropy group.

749

750 **Supplemental Figure 5:** Values of  $\omega_a$  for each of the three gene categories in both the Raleigh  
751 (RAL) and Zambia (ZI) populations of *Drosophila melanogaster*.

752

753

754 **Tables**

**Table 1: The extent of pleiotropy as defined with different annotation methods.**

|   | <b>Definition</b>                                                                                       | <b>Pleiotropic</b> | <b>Immune Non-pleiotropic</b> | <b>Dev Non-pleiotropic</b> |
|---|---------------------------------------------------------------------------------------------------------|--------------------|-------------------------------|----------------------------|
| 1 | Immune = all Immune GO + previous citations. + DE (808)                                                 | 354 (43.8%)        | 454                           | 2992                       |
| 2 | Dev = all Dev GO<br>Immune = Immune<br>Response GO + previous citations + DE (753)                      | 299 (39.7%)        | 454                           | 3047                       |
| 3 | Dev = all Dev GO<br>Immune = Immune<br>Response GO + previous citations+ DE (753)                       | 52 (6.9%)          | 701                           | 210                        |
| 4 | Dev = embryonic Dev GO<br>Immune = Immune<br>Response GO + previous citations (551)<br>Dev = all Dev GO | 276 (50.1%)        | 275                           | 3070                       |

Notes: GO: Gene ontology annotation terms. DE = differentially expressed via transcriptional analyses. Dev = developmental. Previous citations = genes or gene lists manually or computationally identified as having immune system functions in Drosophila

## 756 Figures

757 **Figure 1.** Overall characterization of pleiotropic and non-pleiotropic immune genes. Each  
758 immune gene was assigned a “gene class” (A) depending on their canonical function in an  
759 immune response. For each class, the percentage of pleiotropic (those with developmental roles;  
760 pink) and non-pleiotropic genes (green) was determined (big number: proportion; number in  
761 parentheses: number of genes in that category). The number of known protein-protein  
762 interactions (ppi; B) and number of known gene-gene interactions (ggi; C) were also calculated  
763 for genes annotated as immune non-pleiotropic (green), pleiotropic for development and  
764 immunity (pink), or developmental non-pleiotropic (blue), represented on a log-scale and  
765 statistically analyzed using Kruskal-Wallis tests for overall significance followed by post-hoc  
766 pairwise Dunn tests (Benjamini-Hochberg-adjusted p values on figure).

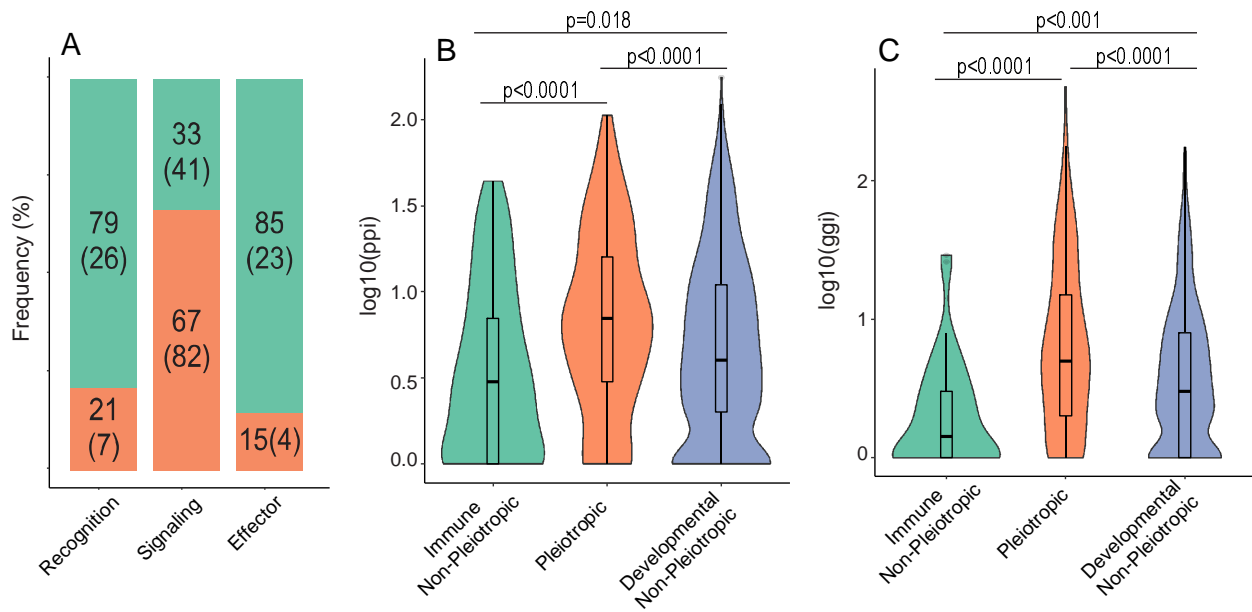

767

768

769 **Figure 2.** Comparison of relative life stage and tissue specificity of gene expression among  
 770 immune, developmental, and pleiotropic genes. The stage specificity tau value, which varies  
 771 from 0 (broadly expressed across all stages) to 1 (expressed in only one stage) was calculated for  
 772 genes within each class (A). For the non-pleiotropic and pleiotropic immune gene group (B), the  
 773 genes within the top 25th percentile of  $\tau$  value were characterized as “specific genes”, and the  
 774 stage with the highest expression for each gene was determined and tallied for the whole group.  
 775 To compare tissue gene expression specificity between pleiotropic and non-pleiotropic genes  
 776 within each life stage (C), the tau value (tissue specificity level) was calculated for each gene  
 777 across tissues. Differences among groups were statistically analyzed using Kruskal-Wallis tests  
 778 for overall significance followed by post-hoc pairwise Dunn tests (Benjamini-Hochberg-adjusted  
 779 p values on figure; \*\*\* indicates  $p_{\text{adj}} < 0.001$ ).

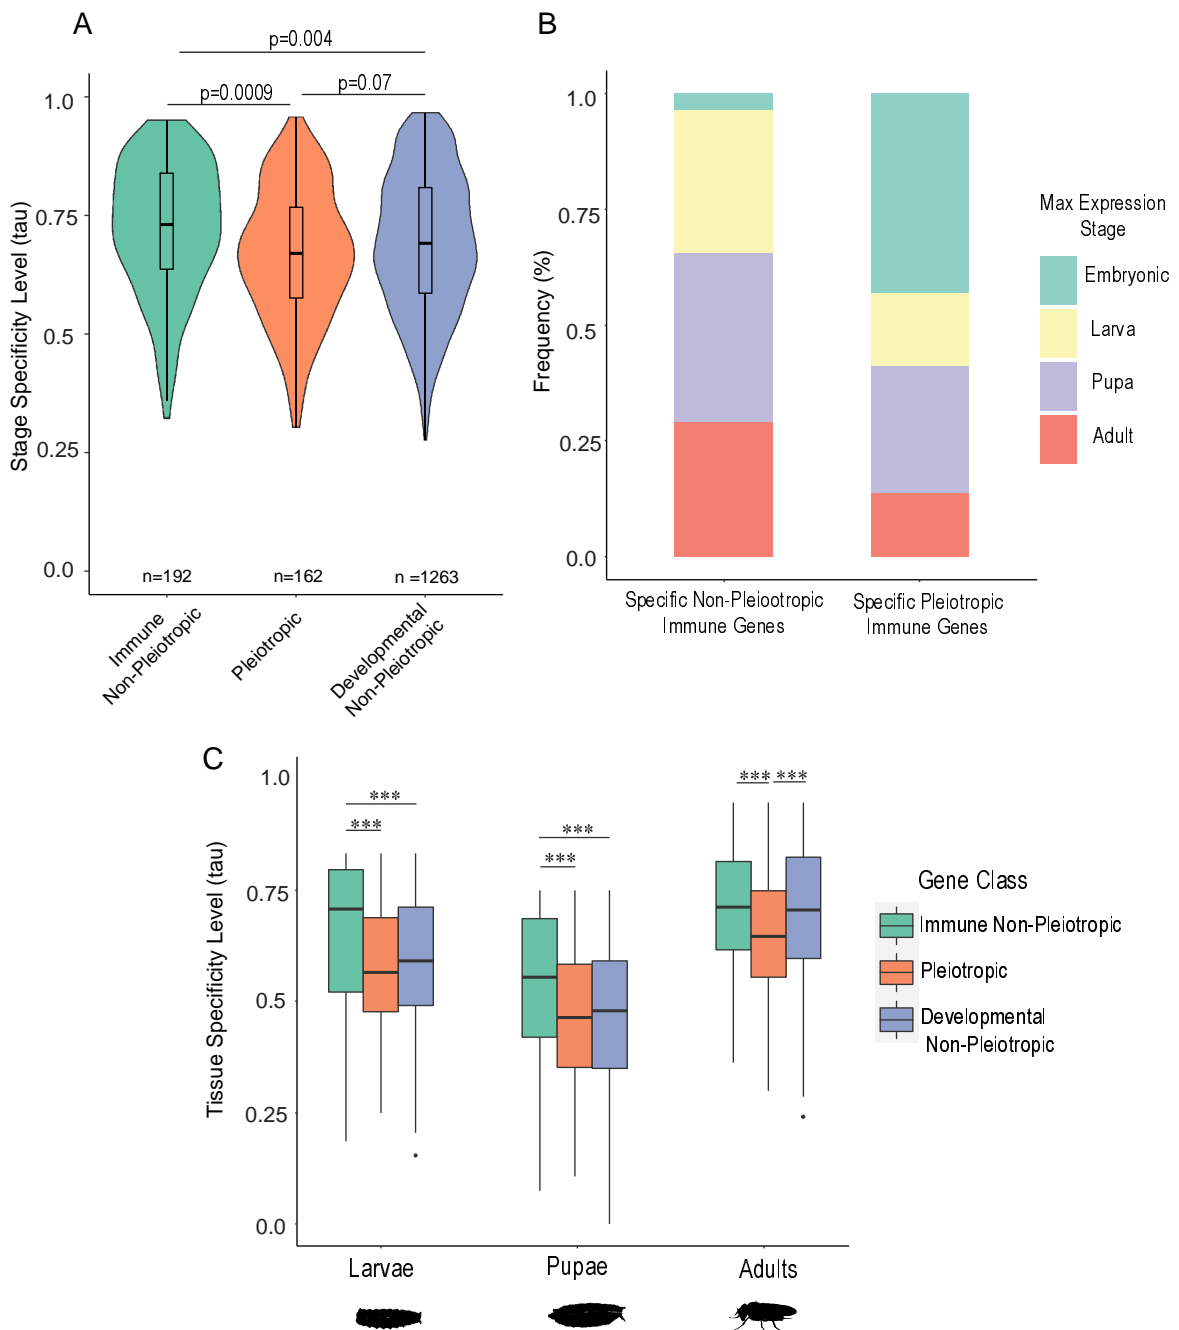

780 **Figure 3.** Associations between genetic pleiotropy, stage specificity, and dN/dS ratios. dN/dS  
 781 values (A) were compared among non-pleiotropic immune genes, genes with pleiotropic roles in  
 782 development and immunity, and developmental genes with no known pleiotropic role in  
 783 immunity. dN/dS values were also compared between pleiotropic genes that scored within the  
 784 top and bottom quartiles of stage-specific expression (B), where non-specific pleiotropic genes  
 785 are broadly expressed across life stages ( $\tau \leq 0.576$ ) while the top quartile are specifically or  
 786 maximally expressed in fewer stages ( $\tau \geq 0.767$ ). Differences among groups were statistically  
 787 analyzed using a Kruskal Wallis test (A) followed by post-hoc Dunn tests (p values BH-adjusted)  
 788 or a Wilcoxon test (B). P values reproduced on the figure; n.s. = not significant ( $p_{\text{adj}} > 0.05$ ). C  
 789 and D depict  $\alpha$  values for all three gene categories in two populations of *Drosophila*  
 790 *melanogaster*, Raleigh (RAL) and Zambia (ZI).  $\alpha$  values were calculated using MultiDFE on 100  
 791 bootstrap replicates of summed site frequency spectra (SFS) for each gene category.  
 792 Distributions were compared using a Kruskal-Wallis test followed by post-hoc Dunn tests in R.  
 793

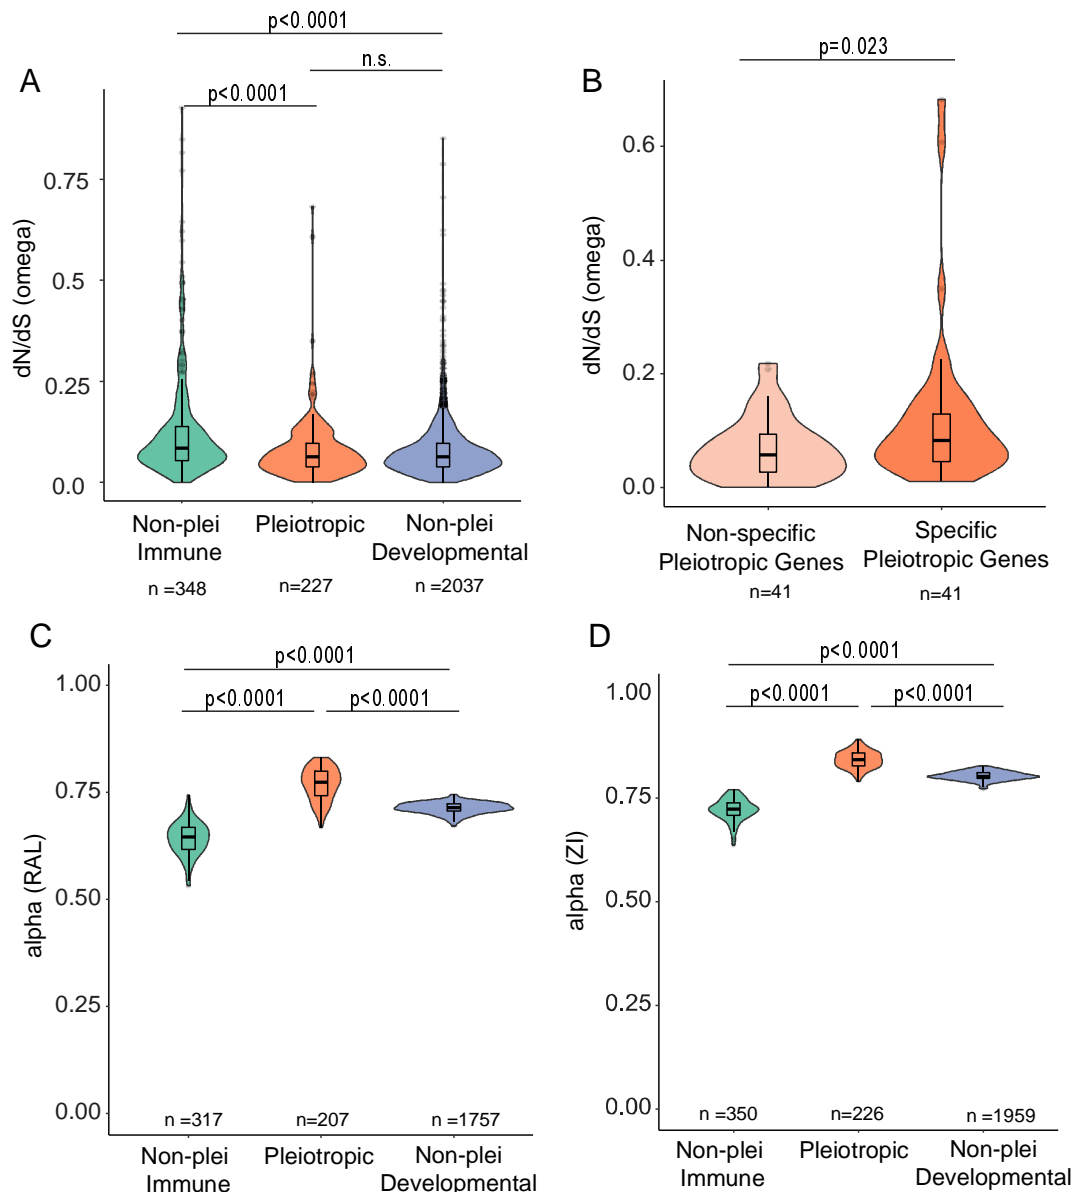

794 **Figure 4.** Examining the pleiotropy status and dN/dS levels for genes participating in major  
 795 insect immune signaling pathways. The color indicates whether has pleiotropic roles in  
 796 development and immunity (blue) or functions exclusively in immunity (orange). Each color is  
 797 shaded according to dN/dS level of each gene, with the darker shade represent a higher  $\omega$  value  
 798 within the gene's respective pleiotropic or non-pleiotropic group. Pathway components reflect  
 799 annotated genes from KEGG. Components for which no pleiotropy status available (e.g. JNKK,  
 800 Spirit) are shown in gray. Yellow stars indicate genes that have a positively selected fraction of  
 801 sites ( $dN/dS > 1$ ) as determined by comparison of PAML models M7 and M8 outputs (see  
 802 methods).  
 803

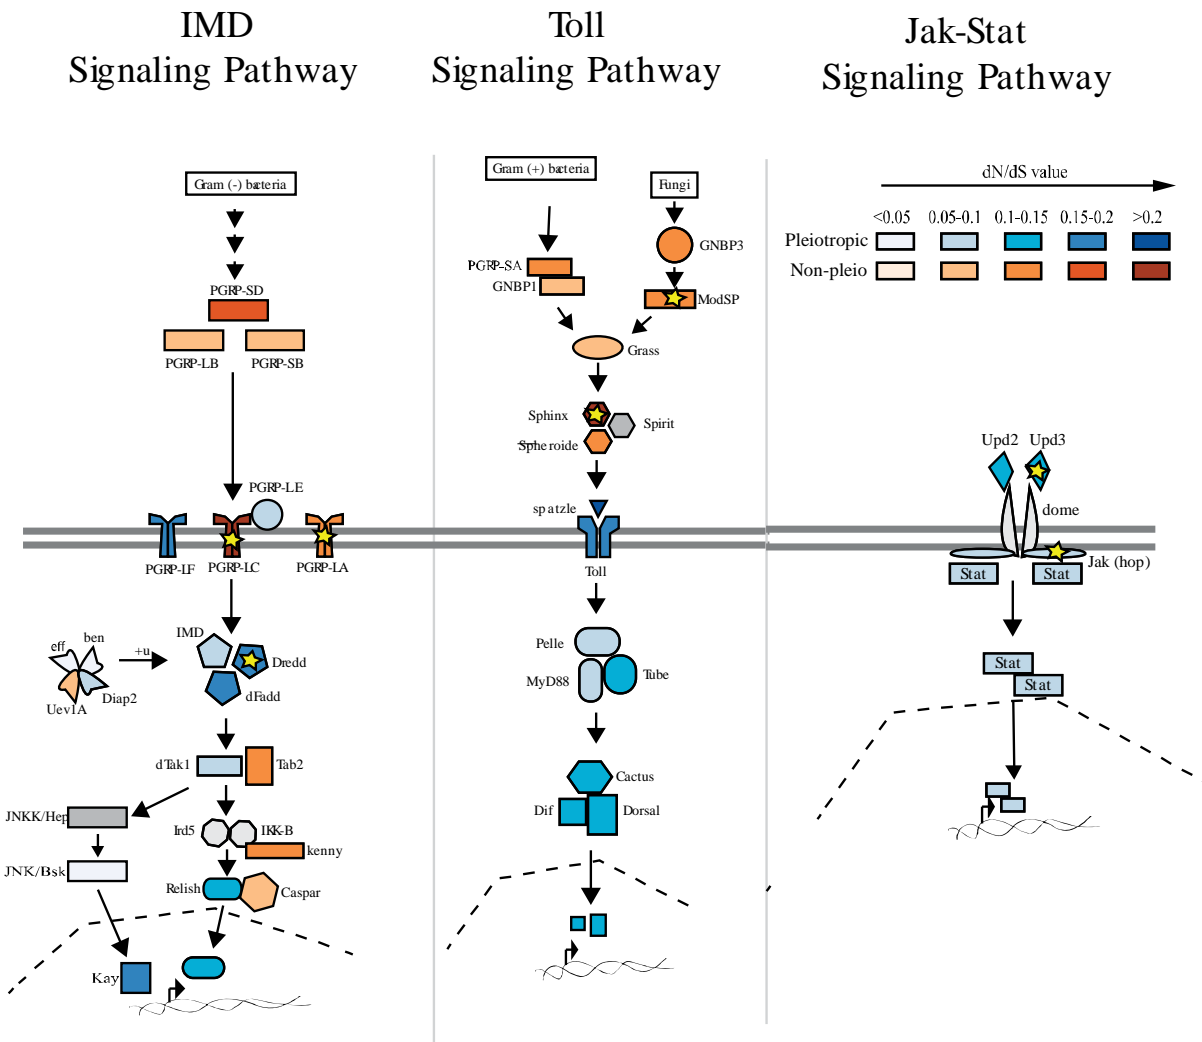

Source: https://www.biorxiv.org/content/10.1101/2021.05.12.443901v2.full.pdf
